# Supplementary material
Source: PubMed Central journal article supplement (PMC2746789)
Supplement: 90844.2008_1.pdf [file 90844.2008_1.pdf]

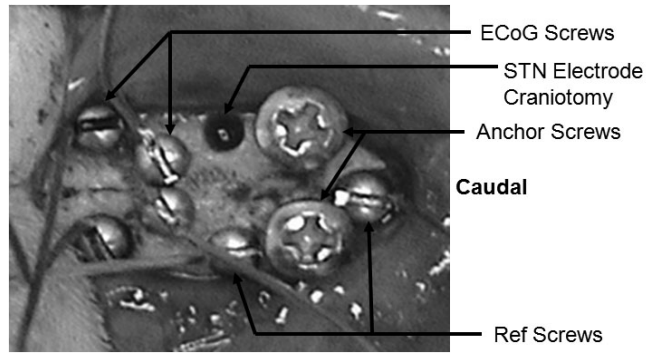

**Supplementary Figure 1:** Location of ECoG electrodes and craniotomy for STN DBS. ECoG electrodes were located bilaterally AP 1.7, ML 2.5 and AP -1.3, ML 1.2 mm, r.e. bregma. Two reference electrodes were located over parietal cortex and the cerebellum. The DBS electrode was positioned AP -3.6, ML 2.5, mm r.e. bregma. Rostral is at left.

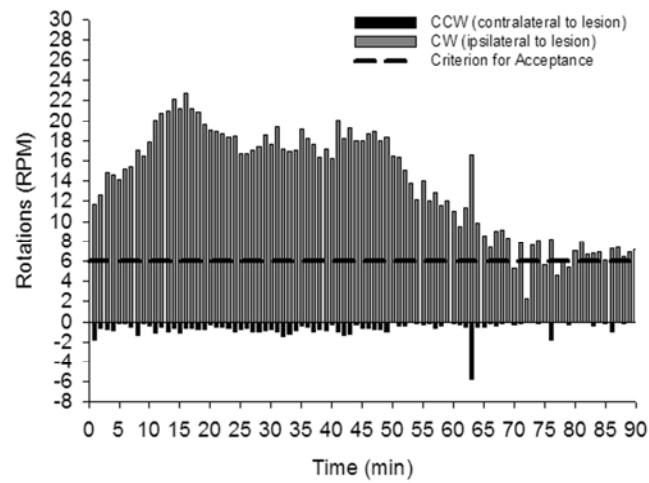

**Supplementary Figure 2:** Amphetamine challenge. 6-OHDA lesioned animals were given an injection of amphetamine to determine the number of rotations ipsilateral to the lesion an animal made in 90 minutes. The criterion for acceptance of an animal in this study is six rotations per minute. CCW rotations (contralateral to the lesion) are coded as negative. In this example, the animal (STN 8) made a significant number of ipsilateral rotations. Data are in 1 min bins.

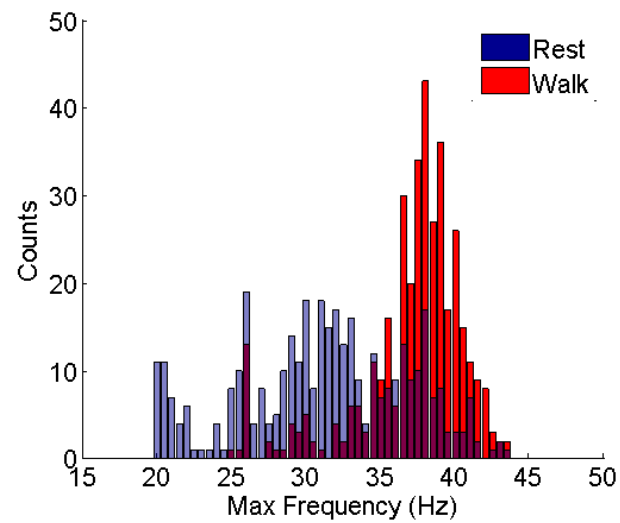

**Supplementary Figure 3:** Distribution of maximum frequencies. Abnormal oscillations typically occur between 20 – 45 Hz. Data are the distribution of frequencies that exhibit maximum power in the power spectral density for all possible recordings while the animal is at rest (blue) or walking on the treadmill (red). Distributions are in 0.5 Hz bins.

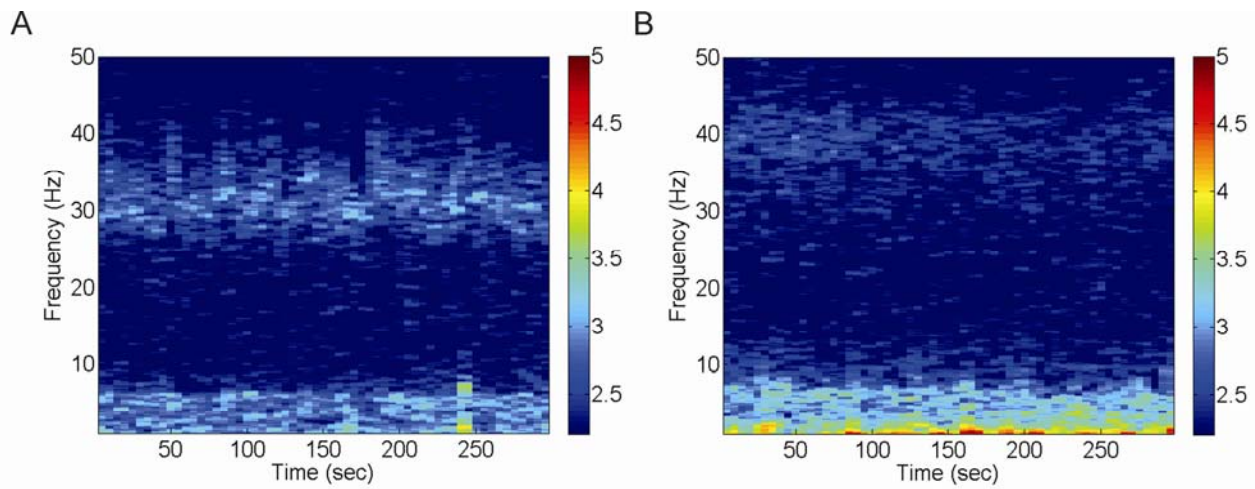

**Supplementary Figure 4:** Parkinsonian power in ECoG recordings is consistent over time. Spectrograms from a single Parkinsonian animal A) at rest and B) walking on a treadmill show consistent power in the  $\beta$ -band and low  $\gamma$ -band, respectively as a function of time. Units are in decibels. Data representative of STN 6.

**Supplementary Table 1:** Kolmogorov-Smirnov Tests. Probability < 0.05 presented in bold.

| <i>DBS</i>                                 |                     |      |                  |                       |      |              |                      |    |      |              |  |
|--------------------------------------------|---------------------|------|------------------|-----------------------|------|--------------|----------------------|----|------|--------------|--|
| <i>All Parameters</i>                      | <b>Parkinsonian</b> |      |                  | <b>Normal</b>         |      |              | <i>Frequency</i>     |    |      |              |  |
|                                            | N                   | Z    | <i>p</i>         | N                     | Z    | <i>p</i>     | <b>Parkinsonian</b>  |    |      |              |  |
| On DBS                                     | 750                 | 2.91 | <b>&lt;0.001</b> | 300                   | 1.49 | <b>0.024</b> | <i>At Max Charge</i> | N  | Z    | <i>p</i>     |  |
| Off DBS                                    | 10                  | 0.81 | 0.536            | 4                     | 0.4  | 0.998        | 0 Hz                 | 10 | 0.81 | 0.536        |  |
| <i>At Max Charge</i>                       |                     |      |                  |                       |      |              | 50 Hz                | 50 | 1.32 | 0.063        |  |
| On DBS                                     | 250                 | 2.02 | <b>0.001</b>     | 100                   | 1.21 | 0.108        | 125 Hz               | 50 | 1.35 | 0.053        |  |
| Off DBS                                    | 10                  | 0.81 | 0.536            | 4                     | 0.4  | 0.998        | 200 Hz               | 50 | 1.04 | 0.23         |  |
| <i>Distribution of Maximum Frequencies</i> |                     |      |                  |                       |      |              | 275 Hz               | 50 | 1.11 | 0.168        |  |
|                                            |                     |      |                  |                       |      |              | 350 Hz               | 50 | 0.74 | 0.644        |  |
| <i>All Parameters</i>                      | <b>Parkinsonian</b> |      |                  | <i>Charge</i>         |      |              |                      |    |      |              |  |
|                                            | N                   | Z    | <i>p</i>         | <b>Parkinsonian</b>   |      |              |                      |    |      |              |  |
| At Rest                                    | 380                 | 1    | 0.268            | <i>All Parameters</i> | N    | Z            | <i>p</i>             |    |      |              |  |
| Walking                                    | 380                 | 3.25 | <b>&lt;0.001</b> | 0 ηC                  | 10   | 0.81         | 0.535                |    |      |              |  |
| <i>State</i>                               |                     |      |                  |                       |      |              | 0.2 ηC               | 50 | 0.55 | 0.551        |  |
| At Rest                                    | <b>Parkinsonian</b> |      |                  | 0.5 ηC                | 50   | 0.96         | 0.319                |    |      |              |  |
| <i>At Max Charge</i>                       | N                   | Z    | <i>p</i>         | 1.0 ηC                | 50   | 1.01         | 0.257                |    |      |              |  |
| On DBS                                     | 125                 | 1.04 | 0.234            | 2.0 ηC                | 50   | 1.1          | 0.174                |    |      |              |  |
| Off DBS                                    | 5                   | 0.84 | 0.474            | 4.0 ηC                | 50   | 1.35         | 0.053                |    |      |              |  |
| Walking                                    |                     |      |                  | <i>Amplitude</i>      |      |              |                      |    |      |              |  |
| <i>At Max Charge</i>                       |                     |      |                  | <b>Parkinsonian</b>   |      |              |                      |    |      |              |  |
| On DBS                                     | 125                 | 1.92 | <b>0.001</b>     | <i>At Max Charge</i>  | N    | Z            | <i>p</i>             |    |      |              |  |
| Off DBS                                    | 5                   | 0.45 | 0.989            | 0 μA                  | 10   | 0.81         | 0.535                |    |      |              |  |
| <i>Behavior</i>                            |                     |      |                  |                       |      |              | 8 μA / 480 μs        | 50 | 1.11 | 0.171        |  |
| <i>All behavior</i>                        | <b>Parkinsonian</b> |      |                  | <b>Normal</b>         |      |              | 16 μA / 240 μs       | 50 | 1    | 0.275        |  |
|                                            | N                   | Z    | <i>p</i>         | N                     | Z    | <i>p</i>     | 33 μA / 120 μs       | 50 | 1.41 | <b>0.039</b> |  |
| On DBS                                     | 8                   | 0.81 | 0.534            | 4                     | 0.53 | 0.945        | 65 μA / 60 μs        | 50 | 1.11 | 0.174        |  |
| Off DBS                                    | 4                   | 0.55 | 0.918            | 2                     | 0.37 | 0.999        | 130 μA / 30 μs       | 50 | 1.3  | 0.07         |  |

**Supplementary Table 2:** Statistical analyses. Frequency (Hz), Charge (nC), and Current (µA). Probability < 0.05 presented in bold.

| <i>DBS</i>            |                  |               |                  |       | <i>State</i>         |                     |                     |  |  |  |
|-----------------------|------------------|---------------|------------------|-------|----------------------|---------------------|---------------------|--|--|--|
| <b>Parkinsonian</b>   |                  | <b>Normal</b> |                  |       | <b>Parkinsonian</b>  |                     |                     |  |  |  |
| Wilcoxon              | DBS On - DBS off | Wilcoxon      | DBS On - DBS off |       | t-test               | Rest (DBS On - Off) |                     |  |  |  |
| <i>All Parameters</i> | Z                | p             | Z                | p     | <i>At Max Charge</i> | t                   | p                   |  |  |  |
|                       | -1.89            | 0.059         | -0.73            | 0.465 |                      | 2.64                | 0.058               |  |  |  |
| Wilcoxon              |                  |               | t-test           |       |                      | Wilcoxon            | Walk (DBS On - Off) |  |  |  |
| <i>At Max Charge</i>  | Z                | p             | t                | p     | <i>At Max Charge</i> | Z                   | p                   |  |  |  |
|                       | -2.7             | <b>0.007</b>  | -1.124           | 0.305 |                      | -1.48               | 0.138               |  |  |  |

  

| <i>Frequency</i>     |      | <i>Bonferroni</i> |     | <i>Frequency (Hz)</i> |       |     |       |      |     |  |
|----------------------|------|-------------------|-----|-----------------------|-------|-----|-------|------|-----|--|
| <b>Parkinsonian</b>  |      | <i>post-hoc</i>   |     | 0                     | 50    | 125 | 200   | 275  | 350 |  |
| one-way ANOVA        |      |                   | 50  | 0.378                 | 1     |     |       |      |     |  |
| <i>At Max Charge</i> | F    | p                 | 125 | 0.084                 | 1     | 1   |       |      |     |  |
| (5,259)              | 3.31 | <b>0.007</b>      | 200 | <b>0.021</b>          | 1     | 1   | 1     |      |     |  |
|                      |      |                   | 275 | 0.647                 | 1     | 1   | 0.583 | 1    |     |  |
|                      |      |                   | 350 | <b>0.015</b>          | 0.963 | 1   | 1     | 0.39 | 1   |  |

  

| <i>Charge</i>         |      | <i>Bonferroni</i> |     | <i>Charge (nC)</i> |              |              |              |       |   |   |
|-----------------------|------|-------------------|-----|--------------------|--------------|--------------|--------------|-------|---|---|
| <b>Parkinsonian</b>   |      | <i>post-hoc</i>   |     | 0                  | 0.2          | 0.5          | 1            | 2     | 4 |   |
| one-way ANOVA         |      |                   | 0.2 | 1                  | 1            |              |              |       |   |   |
| <i>All Parameters</i> | F    | p                 | 0.5 | 1                  | 1            | 1            |              |       |   |   |
| (5,259)               | 4.34 | <b>0.001</b>      | 1   | 1                  | 1            | 1            | 1            |       |   |   |
|                       |      |                   | 2   | 1                  | 1            | 1            | 1            | 1     |   |   |
|                       |      |                   | 4   | <b>0.039</b>       | <b>0.007</b> | <b>0.003</b> | <b>0.032</b> | 0.422 |   | 1 |

  

| <i>Amplitude</i>     |                | <i>Tukey-Kramer</i> |     | <i>Current (µA)</i> |              |       |       |       |     |   |
|----------------------|----------------|---------------------|-----|---------------------|--------------|-------|-------|-------|-----|---|
| <b>Parkinsonian</b>  |                | <i>post-hoc</i>     |     | 0                   | 8            | 16    | 33    | 65    | 130 |   |
| Friedman ANOVA       |                |                     | 8   | 0.561               | 1            |       |       |       |     |   |
| <i>At Max Charge</i> | χ <sup>2</sup> | p                   | 16  | 0.11                | 0.619        | 1     |       |       |     |   |
|                      | 13.83          | <b>0.017</b>        | 33  | <b>0.021</b>        | 0.099        | 0.905 | 1     |       |     |   |
|                      |                |                     | 65  | <b>0.007</b>        | <b>0.017</b> | 0.561 | 0.989 | 1     |     |   |
|                      |                |                     | 130 | 0.056               | 0.331        | 0.998 | 0.992 | 0.835 |     | 1 |

  

| <i>Behavior</i>     |                  |               |                  |       | <i>Distribution of Max Frequencies</i> |             |                  |
|---------------------|------------------|---------------|------------------|-------|----------------------------------------|-------------|------------------|
| <b>Parkinsonian</b> |                  | <b>Normal</b> |                  |       | <b>Parkinsonian</b>                    |             |                  |
| Wilcoxon            | DBS On - DBS off | Wilcoxon      | DBS On - DBS off |       | Wilcoxon                               | Walk - Rest |                  |
| <i>Rotations</i>    | Z                | p             | Z                | p     | <i>All Parameters</i>                  | Z           | p                |
|                     | 1.95             | <b>0.049</b>  | -0.69            | 0.533 |                                        | -13.9       | <b>&lt;0.001</b> |
